# Supplementary material
Source: HighWire-hosted journal article supplement (https://erj.ersjournals.com/content/58/3/2003633)

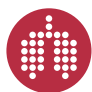

# Intake of *n*-3 polyunsaturated fatty acids in childhood, *FADS* genotype and incident asthma

SHAREABLE PDF

Mohammad Talaei <sup>1</sup>, Emmanouela Sdona <sup>2</sup>, Philip C. Calder <sup>3,4</sup>, Louise R. Jones<sup>5</sup>,  
Pauline M. Emmett <sup>5</sup>, Raquel Granell <sup>6</sup>, Anna Bergström <sup>2,7</sup>, Erik Melén <sup>2,8,9</sup> and Seif O. Shaheen <sup>1</sup>

<sup>1</sup>Institute of Population Health Sciences, Barts and The London School of Medicine and Dentistry, Queen Mary University of London, London, UK. <sup>2</sup>Institute of Environmental Medicine, Karolinska Institute, Stockholm, Sweden. <sup>3</sup>Human Development and Health, Faculty of Medicine, University of Southampton, Southampton, UK. <sup>4</sup>NIHR Southampton Biomedical Research Centre, University Hospital Southampton NHS Foundation Trust and University of Southampton, Southampton, UK. <sup>5</sup>Centre for Academic Child Health, Population Health Sciences, Bristol Medical School, University of Bristol, Bristol, UK. <sup>6</sup>MRC Integrative Epidemiology Unit, Population Health Sciences, Bristol Medical School, University of Bristol, Bristol, UK. <sup>7</sup>Centre for Occupational and Environmental Medicine, Region Stockholm, Stockholm, Sweden. <sup>8</sup>Dept of Clinical Science and Education, Södersjukhuset, Karolinska Institute, Stockholm, Sweden. <sup>9</sup>Sachs' Children and Youth Hospital, Södersjukhuset, Stockholm, Sweden.

Corresponding author: Mohammad Talaei ([m.talaei@qmul.ac.uk](mailto:m.talaei@qmul.ac.uk))

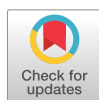

Shareable abstract (@ERSpublications)

**In children with a common fatty acid desaturase (*FADS*) variant, higher intake of eicosapentaenoic acid (EPA) and docosahexaenoic acid (DHA) from fish in mid-childhood was strongly associated with a lower risk of incident asthma up to mid-adolescence** <https://bit.ly/2M4VxO6>

**Cite this article as:** Talaei M, Sdona E, Calder PC, *et al.* Intake of *n*-3 polyunsaturated fatty acids in childhood, *FADS* genotype and incident asthma. *Eur Respir J* 2021; 58: 2003633 [DOI: 10.1183/13993003.03633-2020].

This single-page version can be shared freely online.

Copyright ©The authors 2021

This version is distributed under the terms of the Creative Commons Attribution Licence 4.0.

This article has supplementary material available from [erj.ersjournals.com](http://erj.ersjournals.com)

This article has an editorial commentary: <https://doi.org/10.1183/13993003.01386-2021>

Received: 25 Sept 2020  
Accepted: 14 Jan 2021

## Abstract

Longitudinal evidence on the relation between dietary intake of *n*-3 ( $\omega$ -3) very-long-chain polyunsaturated fatty acids, *i.e.* eicosapentaenoic acid (EPA) and docosahexaenoic acid (DHA), in mid-childhood and asthma risk is scarce. We aimed to investigate whether a higher intake of EPA and DHA from fish in childhood is associated with a lower risk of incident asthma.

In the Avon Longitudinal Study of Parents and Children, dietary intakes of EPA and DHA from fish were estimated by food frequency questionnaire at 7 years of age. We used logistic regression, controlling for confounders, to analyse associations between intake of EPA and DHA (quartiles) and incidence of doctor-diagnosed asthma at age 11 or 14 years, and explored potential effect modification by a fatty acid desaturase (*FADS*) polymorphism (rs1535). Replication was sought in the Swedish BAMSE birth cohort. There was no evidence of association between intake of EPA plus DHA from fish and incident asthma overall ( $n=4543$ ). However, when stratified by *FADS* genotype, the odds ratio comparing the top *versus* bottom quartile among the 2025 minor G allele carriers was 0.49 (95% CI 0.31–0.79;  $p_{\text{trend}}=0.006$ ), but no inverse association was observed in the homozygous major A allele group (OR 1.43, 95% CI 0.83–2.46;  $p_{\text{trend}}=0.19$ ) ( $p_{\text{interaction}}=0.006$ ). This gene–nutrient interaction on incident asthma was replicated in BAMSE. In children with a common *FADS* variant, higher intake of EPA and DHA from fish in childhood was strongly associated with a lower risk of incident asthma up to mid-adolescence.

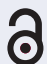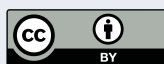

Supplement: inline-supplementary-material-2 [file inline-supplementary-material-2.pdf]
